**Full title:** COVID-19 pandemic responses may impact the spread of antibiotic-resistant bacteria:  
a modelling study

**Short title:** COVID-19 pandemic responses and antibiotic resistance

Aleksandra Kovacevic<sup>1,2¶</sup>, David R M Smith<sup>1,2,3¶</sup>, Eve Rahbé<sup>1,2</sup>, Sophie Novelli<sup>2</sup>, Paul Henriot<sup>3,4</sup>,  
Laura Temime<sup>3,4</sup>, Lulla Opatowski<sup>1,2</sup>

1. Institut Pasteur, Université Paris Cité, Epidemiology and Modelling of Antibiotic Evasion  
(EMAE), Paris, France

2. Université Paris-Saclay, Université de Versailles Saint-Quentin-en-Yvelines, Inserm  
U1018, CESP, Anti-infective evasion and pharmacoepidemiology team, Montigny-Le-  
Bretonneux, France

3. Modélisation, épidémiologie et surveillance des risques sanitaires (MESuRS),  
Conservatoire national des arts et métiers, Paris, France

4. PACRI unit, Institut Pasteur, Conservatoire national des arts et métiers, Paris, France

\*Corresponding author

E-mail: [aleksandra.kovacevic@pasteur.fr](mailto:aleksandra.kovacevic@pasteur.fr) (AK)

¶These authors contributed equally to this work.

**Keywords:** antibiotic resistance; antimicrobial resistance; AMR; COVID-19 pandemic impacts;  
virus-bacteria interaction; pathogen interaction; antibiotic resistant bacteria; invasive bacterial  
disease; modelling; epidemiology; pneumococcus

# **Abstract**

COVID-19 pandemic responses have dramatically modified the global ecological and epidemiological landscape of many infectious diseases. However, the pandemic's impacts on antimicrobial resistance (AMR) are currently poorly understood and lack data. While surges in COVID-19 cases during the first wave of the pandemic may have exacerbated AMR, decreases in antibiotic use may have had the opposite effect. To disentangle how pandemic impacts such as lockdowns and modified antibiotic prescribing may affect AMR, we developed a mathematical model formalizing simultaneous transmission of SARS-CoV-2 and colonization with a bacterial pathogen across six pandemic scenarios. We used simulation to assess the effect of each scenario on the bacterial carriage prevalence, antibiotic resistance rate, and the invasive bacterial disease (IBD) incidence, using parameters based on the commensal community bacterium *Streptococcus pneumoniae*.

Pandemic scenarios without community-wide lockdowns all resulted in a decrease in carriage prevalence of antibiotic-sensitive bacteria and an increase in the prevalence of antibiotic-resistant bacteria, while the addition of a population-wide lockdown resulted in a large reduction in colonization prevalence and IBD incidence for both strains (>70%). This translated to an increase in the antibiotic resistance rate across all scenarios to varying degrees, with lingering effects after the cessation of COVID-19 response measures. In the absence of lockdown, a population-wide surge in antibiotic prescribing coincident with the peak in SARS-CoV-2 infection resulted in the greatest increases in resistance rate (23%) and resistant IBD incidence (6%). Within-host interactions, SARS-CoV-2 variants, and population immunity are found to further drive the magnitude of pandemic impacts on resistant IBD incidence. Sensitivity analyses suggest that the extent of such impacts likely varies across different bacterial species. Although real-life scenarios

are significantly more complicated, our findings suggest that COVID-19 pandemic responses may significantly impact antibiotic resistance in the community and support the need for monitoring resistance during pandemic waves.

## Author Summary

Antimicrobial resistance (AMR) is a leading threat to global health. The ongoing COVID-19 pandemic has occurred during global efforts to combat AMR, and pandemic responses implemented to slow SARS-CoV-2 transmission have dramatically affected the incidence of common viral and bacterial respiratory infections at a global scale. However, impacts of the COVID-19 pandemic on AMR and the incidence of invasive bacterial disease (IBD) caused by antibiotic-resistant bacteria are still being uncovered. Here, we use mathematical modelling to explore how different pandemic scenarios accounting for variation in lockdown implementation and antibiotic use in the community may affect antibiotic-resistant bacteria. We found that lockdown implementation substantially reduces the number of annual cases of resistant IBD (over 70%), although the proportion of resistant bacteria among carriers is expected to increase when prophylactic antibiotics are prescribed in response to SARS-CoV-2 infection. We also found that a population-wide surge in antibiotic prescribing in the absence of lockdown may contribute to a large increase (6%) in the number of IBD cases caused by antibiotic-resistant bacteria, while the effect of reduced antibiotic use is negligible. However, such impacts likely vary depending on the bacterial species considered, within-host interactions, SARS-CoV-2 variants, and population immunization levels.

# Introduction

Responses to the COVID-19 pandemic have generated unprecedented changes in population mixing, care-seeking behavior, and infection prevention and control practices, which have dramatically modified the ecology and epidemiology of infectious diseases at a global scale. Collateral impacts of COVID-19 on epidemiological dynamics have been reported for common viral and bacterial respiratory infections, sexually transmitted infections like HIV, vector-borne infections like Dengue, and even non-communicable diseases [1–4]. However, impacts of COVID-19 on antimicrobial resistance (AMR) remain poorly understood.

AMR is one of the leading threats to global health. In 2019, AMR in clinically relevant bacteria was estimated to be associated with 4.95 million deaths, of which 1.27 million were directly attributable to resistance [5]. Although AMR continues to receive international attention through initiatives like the World Health Organization’s Global Action Plan on AMR [6], the prevention and control of AMR are challenged by a wide range of biological, behavioural, and economic factors, from the evolution of novel multidrug-resistance genes to pervasive inappropriate prescribing, to intensive prophylactic use in food-animal feedlots [7]. The ongoing COVID-19 pandemic has occurred during global efforts to combat AMR and has diverted considerable public health resources, redirecting them instead towards SARS-CoV-2 prevention and COVID-19 mitigation.

Several studies have raised concern about COVID-19-associated antimicrobial overuse or misuse exacerbating AMR, particularly during and following the first wave of the pandemic [8–10]. On the other hand, interventions implemented to control SARS-CoV-2 transmission –

including lockdowns, physical distancing, travel restrictions, face mask use, and improved hygiene practices – may have concomitantly reduced the spread of antimicrobial-resistant pathogens [1,11]. A wide range of other pandemic impacts, such as reduced surveillance capacity, disrupted antimicrobial supply chains, and modified composition of the human microbiota, may have, and continue to influence the epidemiological dynamics of AMR in ways that are as-yet poorly understood [8,12–14].

Mathematical models are useful tools for the simulation and quantification of transmission dynamics, particularly when data are limited or lacking [15]. When factors driving the transmission of one pathogen also impact another – as in the present context of the COVID-19 pandemic and its impacts on antibiotic use and antibiotic-resistant bacteria – a co-circulation model is necessary to better understand mechanistic links between coinciding pathogens. Such co-circulation models must be carefully tailored to the respective pathogens under study to accurately represent the biological mechanisms that drive their transmission across scales, including ecological dynamics within the host (e.g., competitive interactions with other organisms) and epidemiological drivers at the between-host level (e.g., inter-individual contact behaviour) [16–18]. Bacteria-virus interaction models have been used previously to disentangle the public health consequences of interactions between pathogens such as influenza and *Streptococcus pneumoniae* [19–21]. However, in a systematic PubMed search conducted on 1 August 2022, we identified no epidemiological models describing the simultaneous transmission of SARS-CoV-2 and antibiotic-resistant bacteria (see Supporting Information S1.1).

To disentangle how the COVID-19 pandemic has impacted the epidemiology of antibiotic-resistant bacteria, we propose a transmission model that simultaneously describes infection with SARS-CoV-2 and colonization with both sensitive and resistant bacteria, and which includes mechanistic impacts of SARS-CoV-2 infection burden on epidemiological parameters. Bacterial colonization is parameterized based on the commensal respiratory bacterium *S. pneumoniae*. This species was chosen because of its high rate of carriage in community settings, heterogeneous levels of multidrug resistance across countries and demographic groups, and because its transmission was effectively – but inadvertently – controlled by COVID-19 lockdowns in 2020 [1]. We evaluate six different pandemic scenarios, each accounting for impacts of COVID-19 on antibiotic prescribing and inter-individual contact behaviour. Through simulation, we assess how these scenarios impact the prevalence of bacterial carriage, levels of antibiotic resistance, and incidence of the invasive bacterial disease (IBD) caused by antibiotic-resistant bacteria. Furthermore, we assess how IBD incidence may be additionally impacted by factors such as within-host viral interactions, emerging SARS-CoV-2 variants, and varying levels of population immunity.

## Methods

Impacts of the COVID-19 pandemic – such as modified healthcare-seeking behaviour, administration of antibiotic prophylaxis to COVID-19 patients, and implementation of non-pharmaceutical interventions – may be expected to impact selection for the spread of antibiotic-resistant bacteria by modifying antibiotic prescribing and pathogen transmission (Fig 1A). To test these mechanisms, we developed an epidemiological, compartmental, deterministic transmission model describing infection with SARS-CoV-2 and colonization with commensal respiratory bacteria in a large, well-mixed human population. Using this model, we evaluated six pandemic



scenarios by simulating disrupted antibiotic prescribing and the presence or absence of a population-wide lockdown over a 90-day period (Fig 1B and Supporting Information S2).

## Model description

SARS-CoV-2 infection is modelled by a Susceptible-Exposed-Infectious-Recovered (SEIR) process where individuals become infected with SARS-CoV-2 at rate  $\beta_c$  upon contact with other infectious individuals. Infection begins with a non-infectious Exposed period lasting  $\alpha^{-1}$  days and is followed by an infectious period lasting  $\gamma_c^{-1}$  days, eventually leading to recovery and immunization against future re-infection. Waning immunity and competitive multi-strain SARS-CoV-2 dynamics are not considered, since we are interested in the impact of a single COVID-19 wave on bacterial carriage and IBD disease dynamics (Fig S1, Supporting Information).

Individuals in the model can also be uncolonized with the focal bacterial species (U), colonized with either a drug-sensitive ( $C^S$ ) or a drug-resistant strain ( $C^R$ ), or co-colonized with both strains ( $C^{SR}$ ). Colonization with each respective strain is acquired at rates  $\beta_S$  and  $\beta_R$  upon contact with other colonized individuals (Table S1, Supporting Information). We assume a metabolic cost of resistance  $c$ , whereby the drug-resistant strain has a reduced intrinsic transmission rate relative to the drug-sensitive strain,  $\beta_R = \beta_S(1 - c)$ . Bacterial carriage is cleared naturally after an average duration of  $\gamma_b^{-1}$  days. We further assume that some share of the population is exposed to antibiotics at any given time, independently of bacterial carriage, with individuals initiating antibiotic therapy at rate  $\tau$ , which lasts for an average duration of  $d$  days. Individuals exposed to antibiotics are unable to acquire the sensitive strain. Antibiotics are assumed to clear ( $C^S$ ) colonization at a rate  $\omega$  while having no direct impact on ( $C^R$ ) colonization.

This bacterial colonization process results in antibiotic selection for resistance via competition for limited hosts, facilitates epidemiological coexistence between strains and is adapted from previous models of *S. pneumoniae* [22,23].

We make two further assumptions about individuals with active SARS-CoV-2 infection. First, a certain proportion of infectious individuals receives antibiotic prophylaxis for COVID-19, resulting in an increased rate of antibiotic initiation by a factor  $A$ . Second, a certain proportion of infectious individuals undergoes quarantine, resulting in reduced transmission rates for SARS-CoV-2 and both strains of bacteria by a factor  $q$ . This model is illustrated and formalized through a system of ordinary differential equations (ODEs) detailed in Supporting Information S2.1 and S2.2.

### **Simulating different pandemic scenarios**

Using this model, we explored how SARS-CoV-2 outbreaks impact bacterial carriage prevalence, antibiotic resistance rates, and IBD incidence in a simulated population of 100,000 individuals. First, assuming that the bacteria under study are endemic, ODEs were integrated numerically until endemic equilibria were found (see parameter values in Table S1, Supporting Information). Second, using equilibrium states as initial conditions, SARS-CoV-2 was introduced on day 0 ( $t=0$ ), and ODEs were again integrated numerically, this time across six pandemic scenarios. Each scenario involves the modification of epidemiological parameters across the entire population for a 90-day period starting on day 120 in response to a surge in COVID-19 cases (see Table S2, Supporting Information). Two such modifications were considered separately and in combination: changes in antibiotic initiation rate by a factor  $a$  (representing modified healthcare-

seeking behaviour and/or prescribing behaviour), and changes in pathogen transmissibility by a factor  $\theta_\beta$  (representing population-wide lockdowns).

Several epidemiological outcomes were calculated from simulation outputs: (i) daily prevalence of bacterial colonization (the proportion of individuals in the population colonized with antibiotic-sensitive bacteria, antibiotic-resistant bacteria, or co-colonized with both), (ii) daily prevalence of SARS-CoV-2 infection (the proportion of infectious individuals), and (iii) the antibiotic resistance rate, defined as the number of individuals colonized with the resistant strain over the total number colonized (S2.4, Supporting Information). Finally, we estimated the relative change in cumulative IBD incidence (total incidence and incidence due to each strain) over 90 days and 365 days, as compared to the pre-pandemic period (i.e., over the same durations but assuming no SARS-CoV-2 circulation in the population).

### **Within-host interactions**

SARS-CoV-2 infection may impact progression from bacterial colonization to invasive bacterial disease at the within-host level. For instance, some respiratory viruses are known to favour bacterial disease (e.g., see impacts of influenza infection on invasive pneumococcal disease [24,25]), while increased antibiotic exposure in response to COVID-19 may also favour the within-host outgrowth of antibiotic-resistant bacteria [26,27]. To incorporate these mechanisms in our model, we included two within-host interaction terms: the co-infection interaction term ( $\psi_c$ ) increases the rate of progression to invasive disease among colonized individuals who are also infected with SARS-CoV-2, while the antibiotic exposure interaction term ( $\psi_a$ ) increases the rate of progression to invasive disease among individuals exposed to antibiotics and colonized with the

antibiotic-resistant strain [28–31]. The equation for calculating daily IBD incidence assuming within-host interactions due to SARS-CoV-2 co-infection and antibiotic exposure with accompanying details can be found in S2.5, Supporting Information.

## Emerging SARS-CoV-2 variants and immunization

Impacts of SARS-CoV-2 on antibiotic-resistant IBD incidence may depend on the characteristics of locally circulating SARS-CoV-2 variants and their immune escape properties. To account for potential mediating impacts of SARS-CoV-2 transmissibility and population immunity, in simulations we varied (i) values of  $R_0$  (basic reproduction number) for SARS-CoV-2 ( $0 \leq R_0 \leq 10$ ) and (ii) the proportion of the population immunized against SARS-CoV-2 infection at simulation outset (from 0% to 100%).

## Sensitivity analyses

Since there are more than 100 distinct serotypes of *S. pneumoniae* and the duration of pneumococcal carriage varies among different age groups, we conducted two separate sensitivity analyses. In the first one, we varied the duration of bacterial carriage [20, 30, and 50 days] and in the second one, we varied the fitness cost of resistance [0, 0.03, and 0.05] while maintaining the same  $R_0$  value of bacterial colonization to see how changes in these parameters may impact IBD incidence and antibiotic resistance. Considering that this model could apply to any resistant bacterial pathogen that may interact with SARS-CoV-2 (and not only *S. pneumoniae*), we assessed changes in IBD incidence for different combinations of parameters by varying  $R_0$  value of bacterial colonization [1.2, 1.3, and 1.4] and bacterial carriage duration [20, 30, and 50 days] simultaneously.

## Results

### Pandemic waves increase resistance rates, although lockdowns limit bacterial colonization and disease

Pandemic scenarios not including lockdown (scenarios S0, S1, and S2) all resulted in a decrease in carriage of antibiotic-sensitive bacteria and an increase in antibiotic-resistant bacteria (Fig 2A-C, left panels). A population-wide surge in antibiotic prescribing coincident with the peak in SARS-CoV-2 infection (scenario S1) moderately decrease total bacterial carriage but result in the greatest increases in resistance rate (more than 22%) (Fig 2B, middle panel). While total and antibiotic-sensitive IBD incidence decrease, annual antibiotic-resistant IBD incidence increase up to 6% compared to pre-pandemic levels (Fig 2B, right panel). In scenario S2, reductions in overall community prescribing are counteracted by the surge in individuals receiving antibiotic prophylaxis for COVID-19, resulting in a limited overall impact on bacterial epidemiology (Fig 2C).

The addition of a population-wide lockdown (S3, S4, and S5) not only limits the transmission of SARS-CoV-2 but also results in a large reduction in colonization prevalence and IBD incidence for both strains of bacteria, regardless of the antibiotic use modification implemented. However, all scenarios were accompanied by an increase in the antibiotic resistance rate over the 90-day period with the magnitude of increase depending on antibiotic use in the community (Fig 2D-F). As a large share of the population remains susceptible to SARS-CoV-2 infection at the end of the lockdown, a second wave of COVID-19 follows several months later, which further increases the resistance rate due to COVID-19 prophylaxis. However, in all

scenarios including lockdown, annual IBD incidence decreases substantially (up to 70%), with approximately 67% fewer annual cases of antibiotic-resistant IBD.

### **Within-host interactions favour the incidence of antibiotic-resistant invasive bacterial disease**

On the one hand, when SARS-CoV-2 infection is assumed to favour progression from colonization to disease ( $\psi_c > 1$ ), surges in COVID-19 lead to substantial increases in the incidence of antibiotic-resistant IBD (Fig 3A and 3B). Indeed, a rate of disease progression increased by a factor  $\psi_c = 10$ , in approximately 1.1 additional cases/100,000 over the course of one year in the absence of lockdown (scenarios S0, S1, and S2, Fig 3B). On the other hand, when antibiotic use is assumed to favour progression from antibiotic-resistant colonization to disease ( $\psi_a > 1$ ), surges in SARS-CoV-2 infection coincides with transient increases in incidence of antibiotic-resistant IBD, except when surges coincide with reduced antibiotic prescribing (e.g., scenarios S0, S1 vs. scenario S2, Fig 3C). An increased rate of disease progression by  $\psi_a = 10$ , leads to an increase by approximately 1.6 annual additional cases/100,000 of the incidence of antibiotic-resistant bacterial disease in the absence of lockdown (scenario S1, Fig 3D).

### **Emerging SARS-CoV-2 variants and population immunity**

Varying variant characteristics in the simplest scenario S0 (no lockdown, no community-level change in antibiotic prescribing, and no within-host interactions), we found that the annual cumulative incidence of antibiotic-resistant IBD increases with increasing  $R_0$  values of SARS-CoV-2 and decreases with the population immunity against SARS-CoV-2 infection (Fig 4).

## **Sensitivity to the duration of bacterial carriage**

Changing the duration of bacterial carriage while maintaining bacterial  $R_0$  did not change the main trends observed. However, scenarios implemented over a 90-day period had a greater impact on both total and resistant IBD incidence when the duration of bacterial carriage was shorter ( $d = 20$  days) (Fig S3A).

## **Sensitivity to the fitness cost of resistance**

When assuming a lower fitness cost of resistance ( $c$ ) but holding all other bacterial parameters equal, antibiotic-resistant bacteria were more prevalent in the population, as expected, but the relative impacts of pandemic scenarios on IBD incidence and antibiotic resistance rates were smaller (Fig S4). Moreover, in the absence of any resistance cost ( $c = 0$ ) the antibiotic resistance rate decreased during the intervention period in scenario S5 (i.e., with lockdown and reduced community antibiotic prescribing), because resistant carriage prevalence decreased faster than sensitive carriage prevalence, before rising again due to rising antibiotic exposure and COVID-19 prophylaxis. Having a lower cost of resistance also meant that it took more time for resistant IBD incidence and resistance rate to return to the pre-pandemic levels ( $>3$  years).

## **Other bacterial species**

In all scenarios implementing lockdown (S3-S5), resistant IBD incidence did not experience a major change across different bacterial  $R_0$  values during a 90-day period (Fig S6). However, the effect of lockdown was most beneficial in reducing the annual resistant IBD incidence for bacteria with shorter carriage duration and the lower  $R_0$  values. Similar trends were observed for total IBD incidence across all lockdown scenarios (Fig S7). The opposite was true

for bacteria with longer carriage durations and higher values of  $R_0$ . Bacteria with shorter carriage duration and higher  $R_0$  value experienced the greatest increase in annual resistant IBD incidence in the scenario with increased antibiotic use in the community (S1, Fig S6), although the total number of IBD cases was reduced (S1, Fig S7).

## Discussion

We propose a novel co-circulation model describing the spread of SARS-CoV-2 and antibiotic-resistant bacteria in a community setting and show how behavioural responses to the COVID-19 pandemic may differentially impact AMR. By simulating a range of lockdown and antibiotic use scenarios, we highlight potential direct and indirect consequences that outbreaks of novel viral respiratory pathogens like SARS-CoV-2 may have on epidemiological dynamics of antibiotic resistance. We found that IBD incidence may either increase or decrease, depending on how overall antibiotic prescribing in the community changes in response to COVID-19, and on implementation of measures to control viral transmission. Impacts of COVID-19 on IBD incidence and antibiotic resistance rate may linger long after extinction of SARS-CoV-2 outbreaks and the cessation of control measures, and the magnitude of such impacts for any particular bacterium may depend on its duration of carriage and the strength of potential fitness costs of resistance.

Impacts of the COVID-19 pandemic on epidemiological trends of antibiotic-resistant bacteria in community settings are still being uncovered. A study by Tomczyk et al. and the WHO AMR Surveillance Network from March 2021 highlighted that most of the 73 countries surveyed had incomplete data on changing AMR rates due to the pandemic, lack of funding, or disruption of surveillance systems [32]. However, many studies have reported trends in the incidence of



community-acquired bacterial infections since the onset of the pandemic. A comprehensive global analysis using national surveillance data from 26 countries identified substantial and sustained reductions in *S. pneumoniae* incidence after the implementation of COVID-19 control measures such as lockdowns and travel restrictions [1]. Our model scenarios that most closely fit with early 2020 are scenarios including strict lockdown, with or without change in the antibiotic use, which led to similar estimates of the relative (%) reduction in IBD incidence as observed in Brueggemann et al. [1]. Similar findings have been observed in the context of sentinel community-acquired infections in New Zealand [33], invasive pneumococcal disease (IPD) in Taiwan [34] and Hong Kong [35], and lower respiratory tract infection in China [36]. Across these studies, data on the relative impacts of COVID-19 on drug-sensitive versus drug-resistant isolates have been unavailable. However, data from France suggest a reduced proportion of extended spectrum-beta lactam producers among *Escherichia coli* urinary isolates in primary care patients and nursing home residents after the lockdown in March 2020 [37].

Globally, community antibiotic prescribing dropped during the first year of the COVID-19 pandemic compared to the pre-pandemic period. In Europe, antibiotic consumption decreased by almost 20% in 2020 compared to 2019 [38], with heterogeneity between countries and antibiotic classes. Similar temporal trends were observed in England [39], Canada [40], the United States [41], China [42], South Korea [43] and New Zealand [33]. These trends may largely be explained by reduced incidence of seasonal respiratory tract infections, and reduced primary care consultations [44,45]. On the other hand, the advent of telemedicine, pandemic-related patient stress, and antibiotic demand may have to a certain extent mitigated reductions in prescribing owing to reduced consultation [46]. In a global analysis of antimicrobial sales, Khouja et al. found

that antibiotic consumption initially increased by approximately 7% in March 2020, prior to subsequent declines through to August 2020 [47]. Furthermore, while overall prescribing may have decreased, prescription of specific antibiotics has increased, particularly those associated with COVID-19 prophylaxis. For instance, community consumption of azithromycin increased during the first year of the pandemic in multiple countries [48–50]. Several studies have now characterized the wide range of antibiotics provided as prophylaxis to both mild and severe COVID-19 patients in 2020 [51,52], though it remains unclear to what extent prophylaxis is appropriate for prevention of bacterial coinfection in COVID-19 patients, particularly for mild cases treated in the community. Therefore, testing different scenarios with both increases and decreases in antibiotic use seems appropriate due to spatial and temporal heterogeneity in impacts of COVID-19 on antibiotic exposure, especially considering that over time, many trends in antibiotic consumption observed early in the pandemic may have reversed or returned to the pre-pandemic baseline.

Our model shows that antibiotic resistance rates increase with surges in SARS-CoV-2 infections when there is a corresponding increase in antibiotic use due to COVID-19 prophylaxis, as expected, but that lockdowns can mitigate this increasing trend to some degree. To date, few studies have reported resistance rates in carriage from healthy patients during the COVID-19 waves. Using shotgun metagenomics on fecal samples, Peng et al. showed a decrease in Actinobacteria richness in the microbiota of healthy adults from Hong-Kong and an increase of resistance genes against  $\beta$ -lactam antibiotics during the first wave of the pandemic compared to a pre-pandemic period [53]. One simulation study suggests that lockdowns and associated reductions in mobility and human contact (informed by Portuguese mobility data) may have led to

reductions in the diversity of antibiotic resistance genes found in the human microbiome [54]. Such disruptions to human microbiota may have further downstream impacts on colonization resistance and the propensity for antibiotic-resistant bacterial symbionts to transmit [12,55].

One promising outcome of scenarios assuming a decrease in antibiotic use is that increases in antibiotic resistance were minor (Fig 2C and F), while changes in resistant IBD incidence were either negligible (Fig 2C) or negative (Fig 2F). However, for simplicity we simulated reduction of antibiotic use during a single 90-day period only. Real-life scenarios are significantly more complicated and may involve multiple alterations of these factors at different points in time. Over longer timescales, and in the context of successive COVID-19 outbreaks with heterogeneous public health responses and impacts on human behaviour, it is unclear exactly how levels of resistance and burden of disease may be expected to evolve.

SARS-CoV-2 bacterial coinfection has been reported relatively rarely over the course of the pandemic, suggesting that most COVID-19 patients probably do not require antibiotic therapy [10,56,57], although extensive antibiotic prophylaxis may have limited observed co-infection incidence. The inflammatory immune response resulting from COVID-19 likely predisposes patients to subsequent progression to IBD to some extent [58], but antibiotic use may also favour progression to IBD for patients colonized with drug-resistant strains [59]. The results presented here (Fig 3) suggest that such overlapping within-host interactions could have important consequences for the IBD incidence during waves of COVID-19, but future studies are needed to better understand the magnitude of these interactions for *S. pneumoniae* and other commensal, facultatively pathogenic bacteria.

Emerging SARS-CoV-2 variants, which often vary in their transmissibility and severity, may be expected to have variant-specific impacts on AMR, especially in the context of the tightening and loosening of community control measures and their extensive heterogeneity both within and between countries. The highly heterogeneous distribution of diverse SARS-CoV-2 vaccines presents an additional mechanism that may further complexify interactions between antibiotic consumption, community control measures, circulating SARS-CoV-2 variants, and their cumulative impacts on antibiotic resistance. In our simulations, we used SARS-CoV-2 parameter values characteristic of the wild type or ancestral strain with  $R_0 = 2.5$  [60,61] and in the absence of population immunity, best reflecting epidemiological dynamics from early in the pandemic. However, successive SARS-CoV-2 variants of concern, most notably Alpha, Delta, Omicron, and most recently Omicron sub-lineages BA.4 and BA.5 [62], are highly variable in their transmissibility, and evade to some degree the immune protection induced by prior infection and/or vaccination, especially if it has waned over time. Our analysis demonstrates that these viral parameters may affect how SARS-CoV-2 outbreaks impact antibiotic-resistant IBD incidence and shows how increasing SARS-CoV-2  $R_0$  values may exacerbate impacts of COVID-19 on antibiotic resistance, while increasing population immunity may mitigate them (Fig 4). However, the overall impacts of COVID-19 on AMR are difficult to predict, likely vary over the short, medium, and long term, and depend on the specific organism and setting considered.

Our model was structured and parameterized based upon *S. pneumoniae*, but other bacterial species might have been impacted by the COVID-19 outbreak in unique ways. Epidemiological and natural history characteristics of Enterobacterales, for example, strongly differ (e.g., longer

bacterial colonization duration, greater carriage prevalence in the population) relative to respiratory bacteria. However, sensitivity analyses showed that our main conclusions still held across different pandemic scenarios when using different colonization durations but had impacts of different magnitude, suggesting that global trends predicted by our model might hold true for other bacterial species. A study by Zhu et al. showed that observed trends of bloodstream infections (BSI) greatly varied depending on the bacterial species considered, as well as settings: during the first wave, community-acquired *Escherichia coli* BSI fell below pre-pandemic levels whereas hospital-acquired methicillin-resistant *Staphylococcus aureus* BSI had a large increase in numbers compared to pre-pandemic [63].

We present here the first epidemiological model describing how the ongoing COVID-19 pandemic may have and may continue to influence the epidemiological dynamics of AMR. Because this work was intended as a theoretical framework, we aimed at developing the simplest model possible. Nonetheless, an important limitation of our model is the lack of age structure, as SARS-CoV-2 infection risk, IBD risk, disease severity, bacterial carriage prevalence and antibiotic prescribing are all highly heterogeneous across age groups. Ultimately, a lack of available data precluded us from accounting for such levels of complexity. Future work would benefit from integrating real-world data on AMR trends of different bacterial species during multiple COVID-19 waves. Although such data are currently lacking, especially in community settings, longitudinal microbiome sequencing may facilitate better understanding of the impacts of COVID-19 on the transmission of resistance throughout this period. This model can be applied to a wide variety of bacteria and epidemiological scenarios in the community, such as bacterial winter outbreaks as well as more endemic pathogens like ESBL-Enterobacterales.

Our model and discussion have focused on the general community, yet COVID-19 has had distinct impacts on AMR in other settings, particularly in hospitals and long-term care facilities. In these settings, a highly selective environment, favoured by extensive antibiotic use in COVID-19 patients and disruption of antibiotic stewardship programmes, may have predisposed patients and healthcare workers to increased antibiotic resistance carriage. In a meta-analysis conducted on studies published up to June 2020 [64], an estimated 68-81% of patients hospitalized with COVID-19, and 74-94% of patients in intensive care, were treated with antibiotics. In addition, workplace disorganization (e.g., low healthcare worker-patient ratios, overcrowded facilities, longer hospital stays for COVID-19 patients) may have led to decreased antibiotic resistance surveillance and detection, promoting the dissemination of resistant organisms through rooms and wards [8,65]. However, this increase has been mitigated or even absent in settings where antibiotic stewardship programs were implemented, as soon as March 2020, to lower antimicrobial use [66–68]. Increased hygiene through extensive personal protective equipment use and patient isolation also led to decreased antibiotic-resistant organisms in healthcare facilities [8,65]. Specific models dedicated to the analysis of such impact in the hospital could bring a better understanding of the specificities of different settings on the contribution of COVID-19 to the antibiotic resistance burden.

## Conclusion

Using a mathematical modelling approach, we analysed how behavioural responses to the COVID-19 pandemic may differentially impact AMR in the community. In a context where data is still sorely lacking and more studies are required to evaluate the consequences of the pandemic

on the global burden of AMR, this work demonstrates how mathematical modelling can help improve our understanding of the complex, overlapping links between COVID-19 and the epidemiology of antibiotic resistance.

## Author Contributions

Conceptualization: LO, LT, AK, DRMS. Formal Analysis: AK, DRMS. Investigation: AK, DRMS, ER, SN, PH. Methodology: AK, DRMS, LO, LT. Supervision: LO, LT. Writing- Original Draft Preparation: AK, DRMS, ER, SN, PH. Writing- Review & Editing: AK, DRMS, ER, SN, PH, LT, LO.

## Acknowledgements

We thank Thomas Haschka for helpful comments regarding this work.

## References

1. Brueggemann AB, Jansen van Rensburg MJ, Shaw D, McCarthy ND, Jolley KA, Maiden MCJ, et al. Changes in the incidence of invasive disease due to *Streptococcus pneumoniae*, *Haemophilus influenzae*, and *Neisseria meningitidis* during the COVID-19 pandemic in 26 countries and territories in the Invasive Respiratory Infection Surveillance Initiative: a prospective analysis of surveillance data. *Lancet Digit Health*. 2021;3: e360–e370. doi:10.1016/S2589-7500(21)00077-7
2. Palmer K, Monaco A, Kivipelto M, Onder G, Maggi S, Michel J-P, et al. The potential long-term impact of the COVID-19 outbreak on patients with non-communicable diseases

in Europe: consequences for healthy ageing. *Aging Clin Exp Res.* 2020;32: 1189–1194.

doi:10.1007/s40520-020-01601-4

3. Braunstein SL, Lazar R, Wahnich A, Daskalakis DC, Blackstock OJ. Coronavirus Disease 2019 (COVID-19) infection among people with human immunodeficiency virus in New York City: a population-level analysis of linked surveillance data. *Clin Infect Dis.* 2021;72: e1021–e1029. doi:10.1093/cid/ciaa1793
4. Chen Y, Li N, Lourenço J, Wang L, Cazelles B, Dong L, et al. Measuring the effects of COVID-19-related disruption on dengue transmission in southeast Asia and Latin America: a statistical modelling study. *Lancet Infect Dis.* 2022;22: 657–667. doi:10.1016/S1473-3099(22)00025-1
5. Antimicrobial Resistance Collaborators. Global burden of bacterial antimicrobial resistance in 2019: a systematic analysis. *Lancet.* 2022;399: 629–655. doi:10.1016/S0140-6736(21)02724-0
6. World Health Organization. Global action plan on antimicrobial resistance. World Health Organization. 2015 <https://apps.who.int/iris/handle/10665/193736>
7. Holmes AH, Moore LSP, Sundsfjord A, Steinbakk M, Regmi S, Karkey A, et al. Understanding the mechanisms and drivers of antimicrobial resistance. *Lancet.* 2016;387: 176–187. doi:10.1016/S0140-6736(15)00473-0
8. Knight GM, Glover RE, McQuaid CF, Olaru ID, Gallandat K, Leclerc QJ, et al. Antimicrobial resistance and COVID-19: intersections and implications. *Elife.* 2021;10. doi:10.7554/eLife.64139
9. Rusic D, Vilovic M, Bukic J, Leskur D, Seselja Perisin A, Kumric M, et al. Implications of COVID-19 pandemic on the emergence of antimicrobial resistance: adjusting the response



- to future outbreaks. *Life* (Basel). 2021;11. doi:10.3390/life11030220
10. Langford BJ, So M, Raybardhan S, Leung V, Westwood D, MacFadden DR, et al. Bacterial co-infection and secondary infection in patients with COVID-19: a living rapid review and meta-analysis. *Clin Microbiol Infect*. 2020;26: 1622–1629. doi:10.1016/j.cmi.2020.07.016
11. Kadambari S, Goldacre R, Morris E, Goldacre MJ, Pollard AJ. Indirect effects of the covid-19 pandemic on childhood infection in England: population based observational study. *BMJ*. 2022;376: e067519. doi:10.1136/bmj-2021-067519
12. Finlay BB, Amato KR, Azad M, Blaser MJ, Bosch TCG, Chu H, et al. The hygiene hypothesis, the COVID pandemic, and consequences for the human microbiome. *Proc Natl Acad Sci USA*. 2021;118. doi:10.1073/pnas.2010217118
13. Smith DRM, Opatowski L. COVID-19 containment measures and incidence of invasive bacterial disease. *Lancet Digit Health*. 2021;3: e331–e332. doi:10.1016/S2589-7500(21)00085-6
14. Årdal C, Baraldi E, Beyer P, Lacotte Y, Larsson DJ, Ploy M-C, et al. Supply chain transparency and the availability of essential medicines. *Bull World Health Organ*. 2021;99: 319–320. doi:10.2471/BLT.20.267724
15. Heesterbeek H, Anderson RM, Andreasen V, Bansal S, De Angelis D, Dye C, et al. Modeling infectious disease dynamics in the complex landscape of global health. *Science*. 2015;347: aaa4339. doi:10.1126/science.aaa4339
16. Opatowski L, Baguelin M, Eggo RM. Influenza interaction with cocirculating pathogens and its impact on surveillance, pathogenesis, and epidemic profile: A key role for mathematical modelling. *PLoS Pathog*. 2018;14: e1006770.

doi:10.1371/journal.ppat.1006770

17. Birkegård AC, Halasa T, Toft N, Folkesson A, Græsbøll K. Send more data: a systematic review of mathematical models of antimicrobial resistance. *Antimicrob Resist Infect Control*. 2018;7: 117. doi:10.1186/s13756-018-0406-1
18. Ramsay DE, Invik J, Checkley SL, Gow SP, Osgood ND, Waldner CL. Application of dynamic modelling techniques to the problem of antibacterial use and resistance: a scoping review. *Epidemiol Infect*. 2018;146: 2014–2027. doi:10.1017/S0950268818002091
19. Domenech de Cellès M, Arduin H, Lévy-Bruhl D, Georges S, Souty C, Guillemot D, et al. Unraveling the seasonal epidemiology of pneumococcus. *Proc Natl Acad Sci USA*. 2019;116: 1802–1807. doi:10.1073/pnas.1812388116
20. Shrestha S, Foxman B, Dawid S, Aiello AE, Davis BM, Berus J, et al. Time and dose-dependent risk of pneumococcal pneumonia following influenza: a model for within-host interaction between influenza and *Streptococcus pneumoniae*. *J R Soc Interface*. 2013;10: 20130233. doi:10.1098/rsif.2013.0233
21. Arduin H, Domenech de Cellès M, Guillemot D, Watier L, Opatowski L. An agent-based model simulation of influenza interactions at the host level: insight into the influenza-related burden of pneumococcal infections. *BMC Infect Dis*. 2017;17: 382. doi:10.1186/s12879-017-2464-z
22. Colijn C, Cohen T, Fraser C, Hanage W, Goldstein E, Givon-Lavi N, et al. What is the mechanism for persistent coexistence of drug-susceptible and drug-resistant strains of *Streptococcus pneumoniae*? *J R Soc Interface*. 2010;7: 905–919. doi:10.1098/rsif.2009.0400
23. Mulberry N, Rutherford A, Colijn C. Systematic comparison of coexistence in models of

- drug-sensitive and drug-resistant pathogen strains. Theor Popul Biol. 2020;133: 150–158.  
doi:10.1016/j.tpb.2019.12.001
24. Fleming-Dutra KE, Taylor T, Link-Gelles R, Garg S, Jhung MA, Finelli L, et al. Effect of  
the 2009 influenza A(H1N1) pandemic on invasive pneumococcal pneumonia. J Infect Dis.  
2013;207: 1135–1143. doi:10.1093/infdis/jit008
25. Weinberger DM, Simonsen L, Jordan R, Steiner C, Miller M, Viboud C. Impact of the  
2009 influenza pandemic on pneumococcal pneumonia hospitalizations in the United  
States. J Infect Dis. 2012;205: 458–465. doi:10.1093/infdis/jir749
26. Jakobsson HE, Jernberg C, Andersson AF, Sjölund-Karlsson M, Jansson JK, Engstrand L.  
Short-term antibiotic treatment has differing long-term impacts on the human throat and  
gut microbiome. PLoS One. 2010;5: e9836. doi:10.1371/journal.pone.0009836
27. Stecher B, Maier L, Hardt W-D. “Blooming” in the gut: how dysbiosis might contribute to  
pathogen evolution. Nat Rev Microbiol. 2013;11: 277–284. doi:10.1038/nrmicro2989
28. Jenkins TC, Sakai J, Knepper BC, Swartwood CJ, Haukoos JS, Long JA, et al. Risk factors  
for drug-resistant *Streptococcus pneumoniae* and antibiotic prescribing practices in  
outpatient community-acquired pneumonia. Acad Emerg Med. 2012;19: 703–706.  
doi:10.1111/j.1553-2712.2012.01365.x
29. Bengoechea JA, Bamford CG. SARS-CoV-2, bacterial co-infections, and AMR: the deadly  
trio in COVID-19? EMBO Mol Med. 2020;12: e12560. doi:10.15252/emmm.202012560
30. Mirzaei R, Goodarzi P, Asadi M, Soltani A, Aljanabi HAA, Jeda AS, et al. Bacterial co-  
infections with SARS-CoV-2. IUBMB Life. 2020;72: 2097–2111. doi:10.1002/iub.2356
31. Aliberti S, Cook GS, Babu BL, Reyes LF, H Rodriguez A, Sanz F, et al. International  
prevalence and risk factors evaluation for drug-resistant *Streptococcus pneumoniae*

pneumonia. *J Infect.* 2019;79: 300–311. doi:10.1016/j.jinf.2019.07.004

32. Tomczyk S, Taylor A, Brown A, de Kraker MEA, El-Saed A, Alshamrani M, et al. Impact of the COVID-19 pandemic on the surveillance, prevention and control of antimicrobial resistance: a global survey. *J Antimicrob Chemother.* 2021;76: 3045–3058. doi:10.1093/jac/dkab300

33. Duffy E, Thomas M, Hills T, Ritchie S. The impacts of New Zealand’s COVID-19 epidemic response on community antibiotic use and hospitalisation for pneumonia, peritonsillar abscess and rheumatic fever. *Lancet Reg Health West Pac.* 2021;12: 100162. doi:10.1016/j.lanwpc.2021.100162

34. Chien Y-C, Lee Y-L, Liu P-Y, Lu M-C, Shao P-L, Lu P-L, et al. National surveillance of antimicrobial susceptibilities to dalbavancin, telavancin, tedizolid, eravacycline, omadacycline and other comparator antibiotics and serotype distribution of invasive *Streptococcus pneumoniae* isolates in adults: results from the Surveillance of Multicenter Antimicrobial Resistance in Taiwan (SMART) programme in 2017-2020. *J Glob Antimicrob Resist.* 2021;26: 308–316. doi:10.1016/j.jgar.2021.07.005

35. Teng JLL, Fok KMN, Lin KPK, Chan E, Ma Y, Lau SKP, et al. Substantial decline in invasive pneumococcal disease during coronavirus disease 2019 pandemic in hong kong. *Clin Infect Dis.* 2022;74: 335–338. doi:10.1093/cid/ciab382

36. Chen C, Zhu P, Zhang Y, Liu B. Effect of the “Normalized Epidemic Prevention and Control Requirements” on hospital-acquired and community-acquired infections in China. *BMC Infect Dis.* 2021;21: 1178. doi:10.1186/s12879-021-06886-y

37. Lemenand O, Coeffic T, Thibaut S, Colomb Cotinat M, Caillon J, Birgand G, et al. Decreasing proportion of extended-spectrum beta-lactamase among *E. coli* infections

- during the COVID-19 pandemic in France. *J Infect.* 2021; doi:10.1016/j.jinf.2021.09.016
38. Högberg LD, Vlahović-Palčevski V, Pereira C, Weist K, Monnet DL, ESAC-Net study group, et al. Decrease in community antibiotic consumption during the COVID-19 pandemic, EU/EEA, 2020. *Euro Surveill.* 2021;26. doi:10.2807/1560-7917.ES.2021.26.46.2101020
39. Hussain AZ, Paudyal V, Hadi MA. Impact of the COVID-19 pandemic on the prescribing patterns of first-line antibiotics in English primary care: a longitudinal analysis of national prescribing dataset. *Antibiotics (Basel).* 2021;10. doi:10.3390/antibiotics10050591
40. Mamun AA, Saatchi A, Xie M, Lishman H, Blondel-Hill E, Marra F, et al. Community antibiotic use at the population level during the SARS-CoV-2 pandemic in British Columbia, Canada. *Open Forum Infect Dis.* 2021;8: ofab185. doi:10.1093/ofid/ofab185
41. Buehrle DJ, Wagener MM, Nguyen MH, Clancy CJ. Trends in outpatient antibiotic prescriptions in the United States during the COVID-19 pandemic in 2020. *JAMA Netw Open.* 2021;4: e2126114. doi:10.1001/jamanetworkopen.2021.26114
42. Zhang T, Shen X, Liu R, Zhao L, Wang D, Lambert H, et al. The impact of COVID-19 on primary health care and antibiotic prescribing in rural China: qualitative study. *BMC Health Serv Res.* 2021;21: 1048. doi:10.1186/s12913-021-07082-z
43. Ryu S, Hwang Y, Ali ST, Kim D-S, Klein EY, Lau EHY, et al. Decreased use of broad-spectrum antibiotics during COVID-19 epidemic in South Korea. *J Infect Dis.* 2021; doi:10.1093/infdis/jiab208
44. Andrews A, Bou-Antoun S, Guy R, Brown CS, Hopkins S, Gerver S. Respiratory antibacterial prescribing in primary care and the COVID-19 pandemic in England, winter season 2020-21. *J Antimicrob Chemother.* 2022;77: 799–802. doi:10.1093/jac/dkab443

45. Homeniuk R, Collins C. How COVID-19 has affected general practice consultations and income: general practitioner cross-sectional population survey evidence from Ireland. *BMJ Open*. 2021;11: e044685. doi:10.1136/bmjopen-2020-044685
46. Hsu J. How covid-19 is accelerating the threat of antimicrobial resistance. *BMJ*. 2020;369: m1983. doi:10.1136/bmj.m1983
47. Khouja T, Mitsantisuk K, Tadrous M, Suda KJ. Global consumption of antimicrobials: impact of the WHO Global Action Plan on antimicrobial resistance and 2019 coronavirus pandemic (COVID-19). *J Antimicrob Chemother*. 2022;77: 1491–1499. doi:10.1093/jac/dkac028
48. Alain Weill, Jérôme Drouin, David Desplas, Francois Cuenot, Rosemary Dray-Spira, Mahmoud Zureik. Usage des médicaments de ville en France durant l'épidémie de la Covid-19 –point de situation jusqu'au 25 avril 2021. EPI-PHARE - Groupement d'intérêt scientifique (GIS) ANSM-CNAM.
49. Parveen M, Molla MMA, Yeasmin M, Nafisa T, Barna AA, Ghosh AK. Evidences on irrational anti-microbial prescribing and consumption among COVID-19 positive patients and possible mitigation strategies: a descriptive cross sectional study. *Bangladesh J Infect Dis*. 2020; S3–S7. doi:10.3329/bjid.v7i00.50155
50. Bogdanić N, Močibob L, Vidović T, Soldo A, Begovac J. Azithromycin consumption during the COVID-19 pandemic in Croatia, 2020. *medRxiv*. 2021; doi:10.1101/2021.10.31.21265714
51. Cong W, Poudel AN, Alhusein N, Wang H, Yao G, Lambert H. Antimicrobial Use in COVID-19 patients in the first phase of the SARS-CoV-2 pandemic: a scoping review. *Antibiotics (Basel)*. 2021;10. doi:10.3390/antibiotics10060745

52. Adebisi YA, Jimoh ND, Ogunkola IO, Uwizeyimana T, Olayemi AH, Ukor NA, et al. The use of antibiotics in COVID-19 management: a rapid review of national treatment guidelines in 10 African countries. *Trop Med Health*. 2021;49: 51. doi:10.1186/s41182-021-00344-w
53. Peng Y, Zhang D, Chen T, Xia Y, Wu P, Seto W-K, et al. Gut microbiome and resistome changes during the first wave of the COVID-19 pandemic in comparison with pre-pandemic travel-related changes. *J Travel Med*. 2021;28. doi:10.1093/jtm/taab067
54. Rebelo JS, Domingues CPF, Dionisio F, Gomes MC, Botelho A, Nogueira T. COVID-19 Lockdowns May Reduce Resistance Genes Diversity in the Human Microbiome and the Need for Antibiotics. *Int J Mol Sci*. 2021;22. doi:10.3390/ijms22136891
55. Smith DR, Temime L, Opatowski L. Microbiome-pathogen interactions drive epidemiological dynamics of antibiotic resistance: A modeling study applied to nosocomial pathogen control. *Elife*. 2021;10. doi:10.7554/eLife.68764
56. Garcia-Vidal C, Sanjuan G, Moreno-García E, Puerta-Alcalde P, Garcia-Pouton N, Chumbita M, et al. Incidence of co-infections and superinfections in hospitalized patients with COVID-19: a retrospective cohort study. *Clin Microbiol Infect*. 2021;27: 83–88. doi:10.1016/j.cmi.2020.07.041
57. Karami Z, Knoop BT, Dofferhoff ASM, Blaauw MJT, Janssen NA, van Apeldoorn M, et al. Few bacterial co-infections but frequent empiric antibiotic use in the early phase of hospitalized patients with COVID-19: results from a multicentre retrospective cohort study in The Netherlands. *Infect Dis (Lond)*. 2021;53: 102–110. doi:10.1080/23744235.2020.1839672
58. Sender V, Hentrich K, Henriques-Normark B. Virus-induced changes of the respiratory

- tract environment promote secondary infections with *Streptococcus pneumoniae*. *Front Cell Infect Microbiol.* 2021;11: 643326. doi:10.3389/fcimb.2021.643326
59. Baggs J, Jernigan JA, Halpin AL, Epstein L, Hatfield KM, McDonald LC. Risk of subsequent sepsis within 90 days after a hospital stay by type of antibiotic exposure. *Clin Infect Dis.* 2018;66: 1004–1012. doi:10.1093/cid/cix947
60. Sharma V, Rai H, Gautam DNS, Prajapati PK, Sharma R. Emerging evidence on Omicron (B.1.1.529) SARS-CoV-2 variant. *J Med Virol.* 2022;94: 1876–1885. doi:10.1002/jmv.27626
61. Liu Y, Gayle AA, Wilder-Smith A, Rocklöv J. The reproductive number of COVID-19 is higher compared to SARS coronavirus. *J Travel Med.* 2020;27. doi:10.1093/jtm/taaa021
62. ECDC. SARS-CoV-2 variants of concern as of 15 July 2022 [Internet]. 2022 [cited 15 Jul 2022]. Available: <https://www.ecdc.europa.eu/en/covid-19/variants-concern>
63. Zhu N, Rawson TM, Mookerjee S, Price JR, Davies F, Otter J, et al. Changing patterns of bloodstream infections in the community and acute care across two COVID-19 epidemic waves: a retrospective analysis using data linkage. *Clin Infect Dis.* 2021; doi:10.1093/cid/ciab869
64. Langford BJ, So M, Raybardhan S, Leung V, Soucy J-PR, Westwood D, et al. Antibiotic prescribing in patients with COVID-19: rapid review and meta-analysis. *Clin Microbiol Infect.* 2021;27: 520–531. doi:10.1016/j.cmi.2020.12.018
65. Monnet DL, Harbarth S. Will coronavirus disease (COVID-19) have an impact on antimicrobial resistance? *Euro Surveill.* 2020;25. doi:10.2807/1560-7917.ES.2020.25.45.2001886
66. Henig O, Kehat O, Meijer SE, Chikly A, Weiss-Meilik A, Egoz E, et al. Antibiotic use



during the COVID-19 pandemic in a tertiary hospital with an ongoing antibiotic  
stewardship program. *Antibiotics* (Basel). 2021;10. doi:10.3390/antibiotics10091056

67. Seaton RA, Gibbons CL, Cooper L, Malcolm W, McKinney R, Dundas S, et al. Survey of  
antibiotic and antifungal prescribing in patients with suspected and confirmed COVID-19  
in Scottish hospitals. *J Infect*. 2020;81: 952–960. doi:10.1016/j.jinf.2020.09.024

68. Van Laethem J, Wuyts S, Van Laere S, Dirkx S, Seyler L, Mertens R, et al. Antibiotic  
prescriptions targeting bacterial respiratory infections in admitted patients with COVID-19:  
a prospective observational study. *Infect Dis Ther*. 2021;10: 2575–2591.  
doi:10.1007/s40121-021-00535-2

Figures

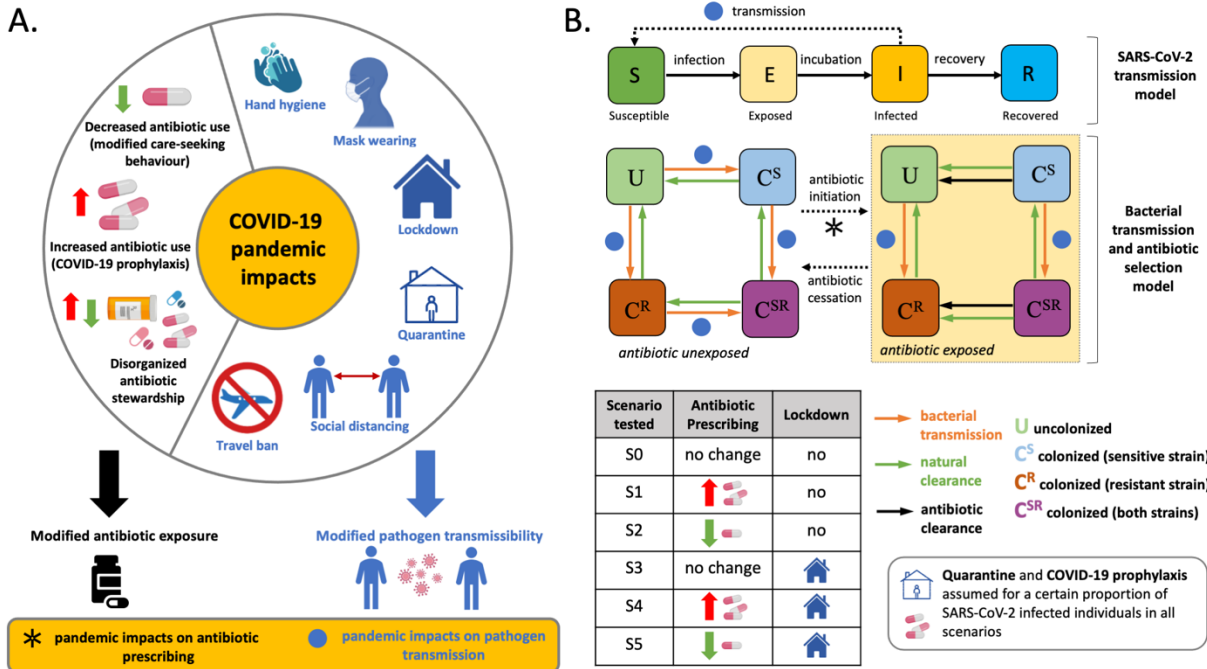

Fig 1.

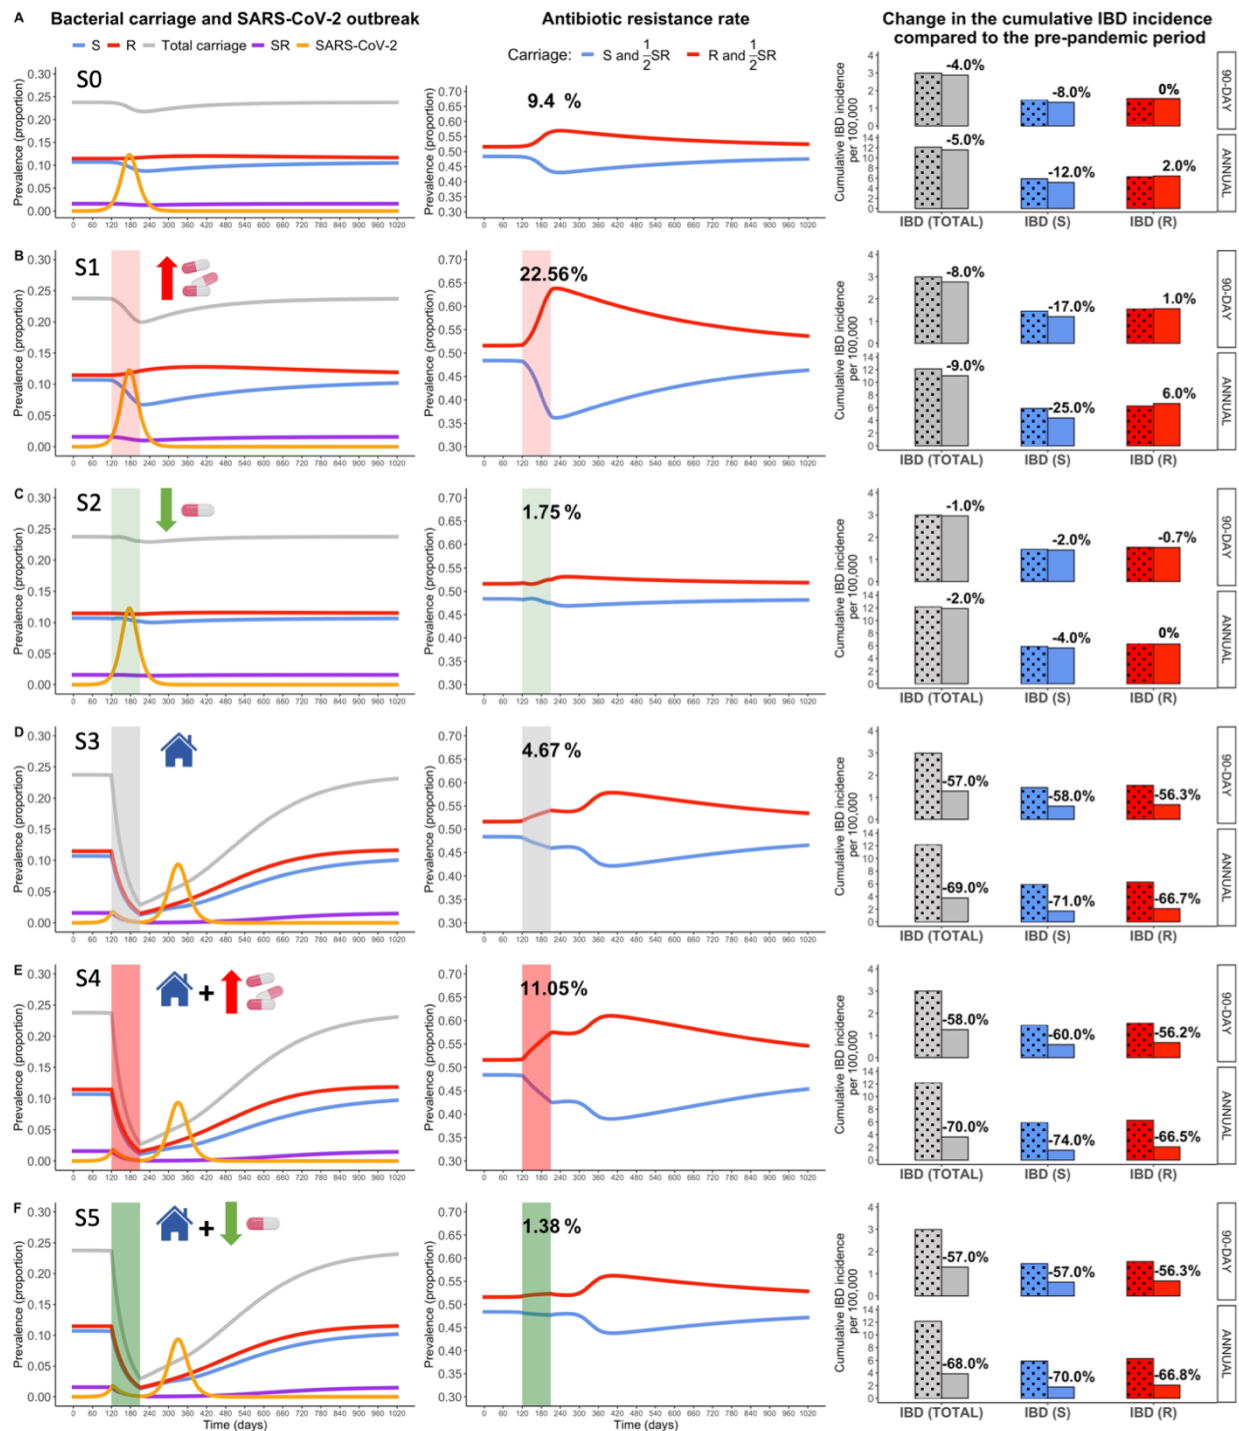

**Fig 2.**

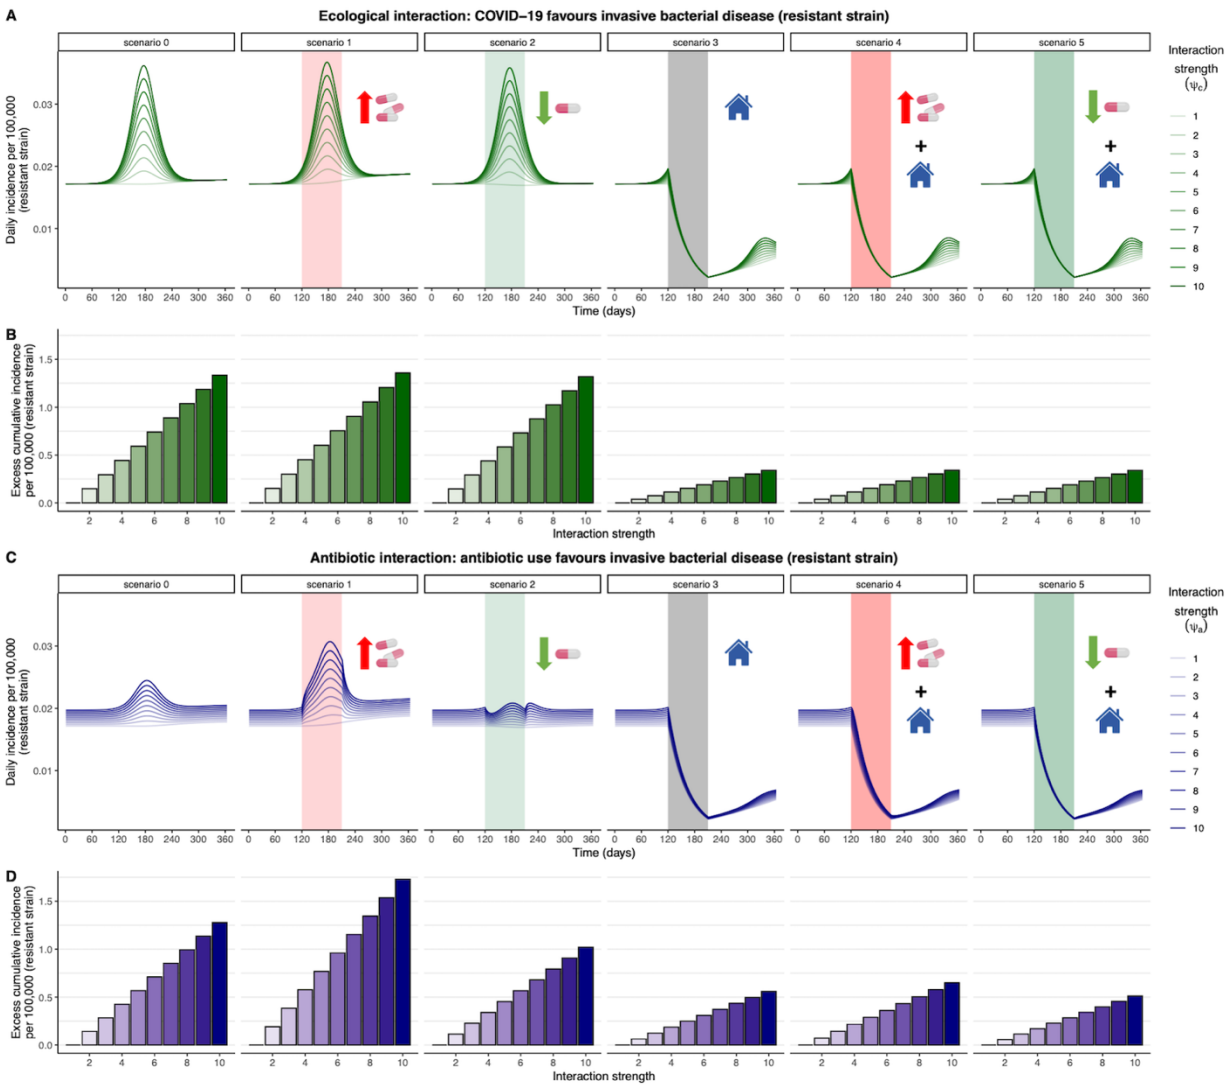

**Fig 3.**

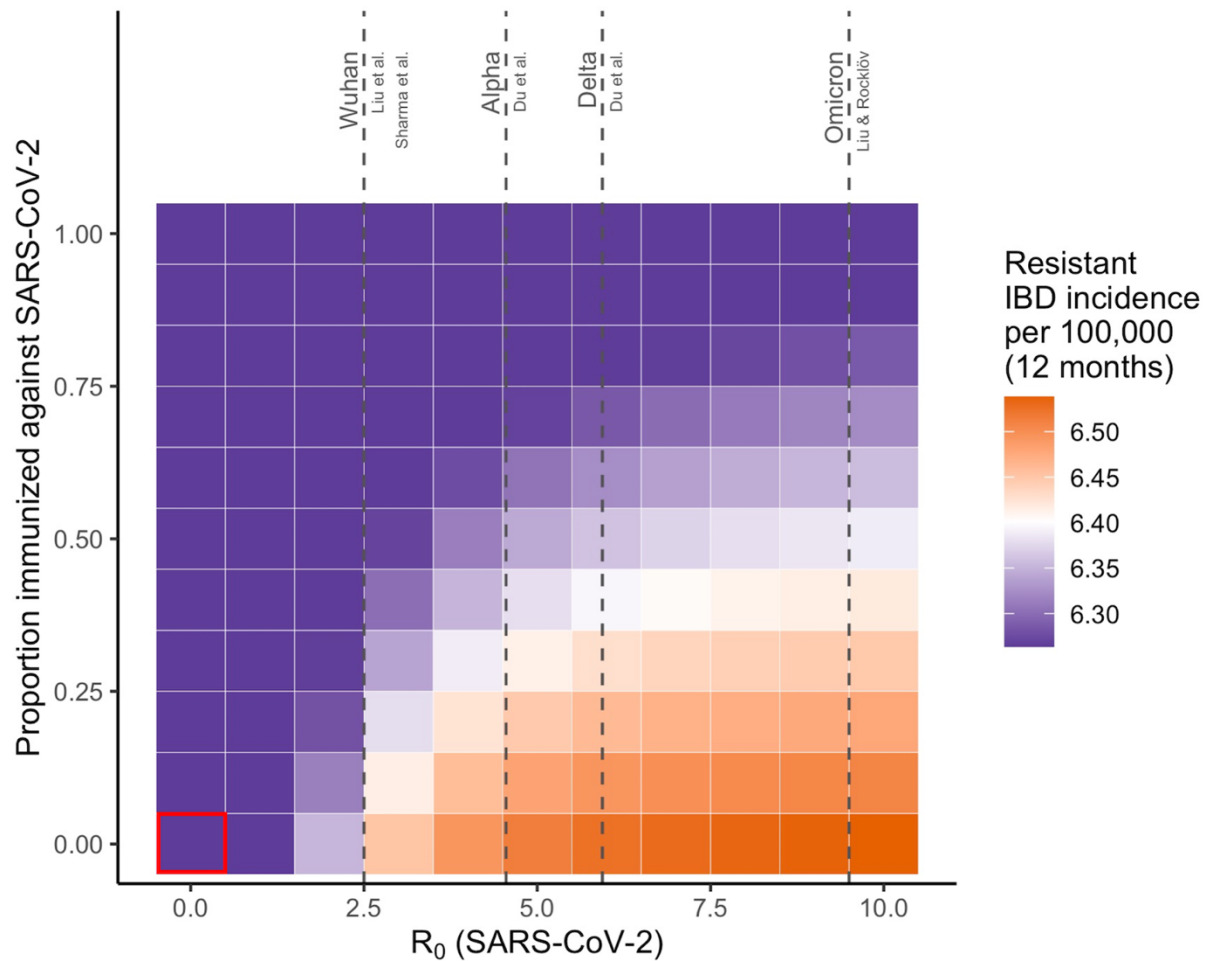

**Fig 4.**

## Figure Legends

**Fig 1. COVID-19 pandemic impacts, model schematic, and community scenarios of antibiotic prescribing and lockdown implementation.**

A. COVID-19 pandemic impacts on antibiotic prescriptions and pathogen transmissibility B. Schematic of the model describing simultaneous co-circulation and transmission of SARS-CoV-2 infection and bacterial carriage. Scenarios implemented over a 90-day period combine factors leading to modifications in antibiotic prescribing in the community relative to the pre-pandemic

period (no change/increase/decrease) and pathogen transmissibility (presence or absence of lockdown). Stars and blue circles represent parameters potentially impacted by COVID-19 burden due, respectively, to modified antibiotic exposure and modified pathogen transmissibility. Model equations, parameters, and a complete list of modelling assumptions are provided in S2, Supporting Information.

**Fig 2. The effect of different community scenarios during the SARS-CoV-2 outbreak on the bacterial carriage, antibiotic resistance, and invasive bacterial disease (IBD) incidence over a period of 90 days and one year.**

A. Scenario 0 (baseline scenario): no lockdown and no modification in the antibiotic use B. Scenario 1: no lockdown with increased antibiotic use C. Scenario 2: no lockdown with decreased antibiotic use D. Scenario 3: lockdown with no modification in the antibiotic use E. Scenario 4: lockdown with increased antibiotic use F. Scenario 5: lockdown with decreased antibiotic use. Highlighted time intervals represent a 90-day intervention period (days 120-210) of lockdown and antibiotic use modifications. SARS-CoV-2 is introduced at initial time  $t=0$ . Columns with dotted pattern represent pre-pandemic baseline - cumulative 90-day and annual IBD incidence (per 100,000).

**Fig 3. Within-host interactions favour the incidence of antibiotic-resistant invasive bacterial disease (IBD) across different scenarios.**

When SARS-CoV-2 infection leads to faster progression from bacterial colonization to disease ( $\psi_c > 1$ ), surges in COVID-19 lead to a greater daily incidence of disease (A) and a greater cumulative burden of disease (B). When antibiotic exposure leads to faster progression from

antibiotic resistant bacterial colonization to disease ( $\psi_a > 1$ ), surges in COVID-19 can also lead to a greater daily incidence of disease (C) and a greater cumulative burden of disease (D). Here, simulations were truncated at time  $t=365$  days to evaluate cumulative impacts of interactions after COVID-19 outbreak. Panels (B) and (D) show excess annual antibiotic-resistant IBD incidence (per 100,000) due to within-host interactions.

**Fig 4. Annual cumulative incidence of antibiotic-resistant invasive bacterial disease (IBD) across different combinations of  $R_0$  (SARS-CoV-2) values and levels of population immunity at SARS-CoV-2 introduction.**

Assuming that there is no lockdown implementation and no change in the antibiotic prescribing in the community (except for COVID-19 prophylaxis in a certain proportion of infected individuals) – scenario S0 – the cumulative incidence of antibiotic-resistant IBD increases with the increasing  $R_0$  values of SARS-CoV-2 (x-axis) and decreases with the increasing proportion of the population immunized against SARS-CoV-2 infection (y-axis). Square with the red border indicates baseline antibiotic-resistant IBD incidence when there is no SARS-CoV-2 circulating in the population and no immunization.  $R_0$  estimates for different SARS-CoV-2 variants of concern (Wuhan, Alpha, Delta, and Omicron) are also depicted.
